# Supplementary material
Source: PubMed Central journal article supplement (PMC2951719)
Supplement: ja1050082_si_001.pdf [file ja1050082_si_001.pdf]

# Water in cavity-ligand recognition

Riccardo Baron,<sup>\*,†,‡</sup> Piotr Setny,<sup>\*,†,¶,‡</sup> and J. Andrew McCammon<sup>†</sup>

*Department of Chemistry and Biochemistry, Center for Theoretical Biological Physics, Howard Hughes Medical Institute, Department of Pharmacology, University of California, San Diego, U.S.A., , and Physics Department, Technical University Munich, 85748 Garching, Germany*

E-mail: rbaron@mccammon.ucsd.edu; piotr.setny@tum.de

## Supporting Information

### Movie S1

Video clip showing changes in water density distribution along the (N,N) cavity-ligand binding coordinate. See Fig. 2 legend for color coding and the corresponding thermodynamic analysis.

### Movie S2

Video clip showing changes in water density distribution along the (+,N) cavity-ligand binding coordinate. See Fig. 2 legend for color coding, Fig. 3 for the corresponding thermodynamic analysis.

---

\*To whom correspondence should be addressed

†Department of Chemistry and Biochemistry, Center for Theoretical Biological Physics, Howard Hughes Medical Institute, Department of Pharmacology, University of California, San Diego, U.S.A.

‡These authors contributed equally to this work

¶Technical University Munich

### **Movie S3**

Video clip showing changes in water density distribution along the  $(-,N)$  cavity-ligand binding coordinate. See Fig. 2 legend for color coding, Fig. 3 for the corresponding thermodynamic analysis.

### **Movie S4**

Video clip showing changes in water density distribution along the  $(-,+)$  cavity-ligand binding coordinate. See Fig. 2 legend for color coding, Fig. 4 for the corresponding thermodynamic analysis.

### **Movie S5**

Video clip showing changes in water density distribution along the  $(+,-)$  cavity-ligand binding coordinate. See Fig. 2 legend for color coding, Fig. 4 for the corresponding thermodynamic analysis.

### **Movie S6**

Video clip showing changes in water density distribution along the  $(N,+)$  cavity-ligand rejection coordinate. See Fig. 2 legend for color coding, Fig. 5 for the corresponding thermodynamic analysis.

### **Movie S7**

Video clip showing changes in water density distribution along the  $(N,-)$  cavity-ligand rejection coordinate. See Fig. 2 legend for color coding, Fig. 5 for the corresponding thermodynamic analysis.
